# Supplementary material
Source: PubMed Central journal article supplement (PMC3673661)
Supplement: chest_143_6_1607_ds01.pdf [file chest_143_6_1607_ds01.pdf]

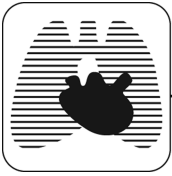

### Characterizing Functional Lung Heterogeneity in COPD Using Reference Equations for CT Scan-Measured Lobar Volumes

Carolyn E. Come, MD, MPH; Alejandro A. Diaz, MD; Douglas Curran-Everett, PhD; Nivedita Muralidhar, BS; Craig P. Hersh, MD, MPH; Jordan A. Zach, BA; Joyce Schroeder, MD; David A. Lynch, MD; Bartolome Celli, MD, FCCP; and George R. Washko, MD, MMSc; for the COPDGene Investigators

**This supplement provides the reader with results of additional analyses.**

#### Results

**e-Table 1.** Difference in total lung and lobar volumes at TLC and FRC between males and females after adjusting for height

|                   | Male vs. Female | p-value |
|-------------------|-----------------|---------|
| TLC               |                 |         |
| Total lung volume | 935 mL          | <0.0001 |
| LLL               | 195 mL          | <0.0001 |
| LUL               | 271 mL          | <0.0001 |
| RLL               | 161 mL          | <0.0001 |
| RML               | 79 mL           | <0.0001 |
| RUL               | 229 mL          | <0.0001 |
| FRC               |                 |         |
| Total lung volume | 411 mL          | <0.0001 |
| LLL               | 57 mL           | 0.0003  |
| LUL               | 138 mL          | <0.0001 |
| RLL               | 48 mL           | 0.003   |
| RML               | 53 mL           | <0.0001 |
| RUL               | 115 mL          | <0.0001 |

N=469 for TLC measures

N=419 for FRC measures

*Online supplements are not copyedited prior to posting.*



**e-Table 2.** Difference in total lung and lobar volumes at TLC and FRC between Non-Hispanic Whites and African Americans after adjusting for height

|                   | Non-Hispanic White vs. African American | p-value |
|-------------------|-----------------------------------------|---------|
| <b>TLC</b>        |                                         |         |
| Total lung volume | 783 mL                                  | <0.0001 |
| LLL               | 245 mL                                  | <0.0001 |
| LUL               | 108 mL                                  | <0.0001 |
| RLL               | 288 mL                                  | <0.0001 |
| RML               | 81 mL                                   | <0.0001 |
| RUL               | 61 mL                                   | 0.004   |
| <b>FRC</b>        |                                         |         |
| Total lung volume | 102 mL                                  | 0.09    |
| LLL               | 57 mL                                   | 0.0001  |
| LUL               | -15 mL                                  | 0.47    |
| RLL               | 64 mL                                   | <0.0001 |
| RML               | 14 mL                                   | 0.15    |
| RUL               | -18 mL                                  | 0.30    |

N=469 for TLC measures

N=419 for FRC measures

**e-Table 3.** Prediction Equations for Lobar Volume at Full Inflation – Derivation Cohort

| Group                       | LLL volume                            | Model R <sup>2</sup> |
|-----------------------------|---------------------------------------|----------------------|
| Non-Hispanic Whites (N=386) | = -1858.07 + 18.62(ht) + 202.87(male) | 0.66                 |
| African Americans (N=83)    | = -1533.29 + 15.10(ht) + 238.87(male) | 0.68                 |

| Group                       | LUL volume                            | Model R <sup>2</sup> |
|-----------------------------|---------------------------------------|----------------------|
| Non-Hispanic Whites (N=386) | = -1621.46 + 16.89(ht) + 272.67(male) | 0.73                 |
| African Americans (N=83)    | = -1143.89 + 13.30(ht) + 297.52(male) | 0.79                 |

| Group                       | RLL volume                            | Model R <sup>2</sup> |
|-----------------------------|---------------------------------------|----------------------|
| Non-Hispanic Whites (N=386) | = -1802.93 + 19.03(ht) + 190.67(male) | 0.63                 |
| African Americans (N=83)    | = -1824.95 + 17.65(ht) + 119.44(male) | 0.62                 |

| Group                       | RML volume                          | Model R <sup>2</sup> |
|-----------------------------|-------------------------------------|----------------------|
| Non-Hispanic Whites (N=386) | = -946.77 + 8.35(ht) + 72.33(male)  | 0.53                 |
| African Americans (N=83)    | = -369.57 + 4.29(ht) + 127.25(male) | 0.65                 |

| Group                       | RUL volume                           | Model R <sup>2</sup> |
|-----------------------------|--------------------------------------|----------------------|
| Non-Hispanic Whites (N=386) | = -939.47 + 11.52(ht) + 229.91(male) | 0.64                 |
| African Americans (N=83)    | = -461.16 + 8.25(ht) + 239.53(male)  | 0.63                 |

ht = height in centimeters, male = 1 for male and 0 for female

*Online supplements are not copyedited prior to posting.*



**e-Table 4.** Prediction Equations for Lobar Volume at End of Normal Exhalation – Derivation Cohort

| Group                       | LLL volume                          | Model R <sup>2</sup> |
|-----------------------------|-------------------------------------|----------------------|
| Non-Hispanic Whites (N=345) | = -772.58 + 7.78(ht) + 48.76(male)  | 0.42                 |
| African Americans (N=74)    | = -441.14 + 5.28(ht) + 110.84(male) | 0.35                 |

  

| Group                       | LUL volume                          | Model R <sup>2</sup> |
|-----------------------------|-------------------------------------|----------------------|
| Non-Hispanic Whites (N=345) | = -860.55 + 8.87(ht) + 121.78(male) | 0.47                 |
| African Americans (N=74)    | = -579.41 + 6.99(ht) + 204.09(male) | 0.45                 |

  

| Group                       | RLL volume                         | Model R <sup>2</sup> |
|-----------------------------|------------------------------------|----------------------|
| Non-Hispanic Whites (N=345) | = -571.06 + 6.93(ht) + 53.23(male) | 0.38                 |
| African Americans (N=74)    | = -780.06 + 7.78(ht) + 48.89(male) | 0.29                 |

  

| Group                       | RML volume                         | Model R <sup>2</sup> |
|-----------------------------|------------------------------------|----------------------|
| Non-Hispanic Whites (N=345) | = -469.00 + 4.36(ht) + 45.16(male) | 0.38                 |
| African Americans (N=74)    | = -291.76 + 3.06(ht) + 94.55(male) | 0.56                 |

  

| Group                       | RUL volume                          | Model R <sup>2</sup> |
|-----------------------------|-------------------------------------|----------------------|
| Non-Hispanic Whites (N=345) | = -485.86 + 6.04(ht) + 102.26(male) | 0.41                 |
| African Americans (N=74)    | = 40.06 + 2.83(ht) + 161.02(male)   | 0.31                 |

ht = height in centimeters, male = 1 for male and 0 for female

\*23/386 Non-Hispanic Whites and 5/83 African Americans did not have lobar volume measurements at the end of normal exhalation; 18/386 Non-Hispanic Whites and 4/83 African Americans were excluded because of total lung volume at FRC to total lung volume at TLC ratios that were outside the middle 95% of the distribution.



**e-Table 5.** Lobar volume and Percent Emphysema by GOLD Stage

| Lobe   | Volume (mL) | Percent Emphysema  |
|--------|-------------|--------------------|
| LUL    |             |                    |
| GOLD 2 | 1429 ± 393  | 5.4 (2.2 – 12.8)   |
| GOLD 3 | 1550 ± 453  | 16.5 (6.3 – 28.2)  |
| GOLD 4 | 1668 ± 447  | 27.1 (15.3 – 40.3) |
| LLL    |             |                    |
| GOLD 2 | 1263 ± 384  | 3.6 (1.4 – 8.3)    |
| GOLD 3 | 1362 ± 403  | 11.4 (4.2 – 21.8)  |
| GOLD 4 | 1557 ± 452  | 22.3 (12.0 – 35.3) |
| RUL    |             |                    |
| GOLD 2 | 1265 ± 377  | 4.7 (1.5 – 13.9)   |
| GOLD 3 | 1406 ± 441  | 17.1 (5.8 – 31.4)  |
| GOLD 4 | 1541 ± 442  | 29.3 (15.6 – 47.4) |
| RML    |             |                    |
| GOLD 2 | 466 ± 164   | 5.3 (1.9 – 12.3)   |
| GOLD 3 | 477 ± 177   | 13.1 (5.3 – 24.5)  |
| GOLD 4 | 482 ± 197   | 19.8 (10.1 – 31.1) |
| RLL    |             |                    |
| GOLD 2 | 1350 ± 382  | 3.3 (1.2 – 7.9)    |
| GOLD 3 | 1400 ± 391  | 12.0 (4.2 – 21.8)  |
| GOLD 4 | 1561 ± 436  | 24.3 (12.0 – 36.9) |

Volumes presented as means +/- standard deviations. Percent emphysema presented as medians and interquartile ranges.

GOLD 1 (N=1069), GOLD 2 (N=727), GOLD 3 (N=395)



**e-Table 6.** Correlations between lobar volume and percent emphysema (A) and between percent predicted lobar volume and percent emphysema (B) by GOLD stage

| <b>Lobe</b> | <b>A</b>       | <b>B</b>       |
|-------------|----------------|----------------|
| LUL         |                |                |
| GOLD 2      | 0.41, p<0.0001 | 0.46, p<0.0001 |
| GOLD 3      | 0.37, p<0.0001 | 0.52, p<0.0001 |
| GOLD 4      | 0.27, p<0.0001 | 0.39, p<0.0001 |
| LLL         |                |                |
| GOLD 2      | 0.39, p<0.0001 | 0.35, p<0.0001 |
| GOLD 3      | 0.43, p<0.0001 | 0.48, p<0.0001 |
| GOLD 4      | 0.48, p<0.0001 | 0.48, p<0.0001 |
| RUL         |                |                |
| GOLD 2      | 0.45, p<0.0001 | 0.52, p<0.0001 |
| GOLD 3      | 0.40, p<0.0001 | 0.53, p<0.0001 |
| GOLD 4      | 0.28, p<0.0001 | 0.44, p<0.0001 |
| RML         |                |                |
| GOLD 2      | 0.20, p<0.0001 | 0.12, p<0.0001 |
| GOLD 3      | 0.06, p=0.09   | 0.10, p=0.007  |
| GOLD 4      | 0.16, p=0.002  | 0.17, p=0.001  |
| RLL         |                |                |
| GOLD 2      | 0.33, p<0.0001 | 0.32, p<0.0001 |
| GOLD 3      | 0.41, p<0.0001 | 0.45, p<0.0001 |
| GOLD 4      | 0.40, p<0.0001 | 0.46, p<0.0001 |

Spearman correlation coefficients are presented  
GOLD 1 (N=1069), GOLD 2 (N=727), GOLD 3 (N=395)
